# Supplementary material for: A new N-substituted heteroacene can detect CN− and F− anions via anion–π interaction
Source: Royal Society of Chemistry journal article supplement (doi:10.1039/c3ra40845k), 2013-01-01
Supplement: c3ra40845k.pdf [file c3ra40845k.pdf]

## Supporting Information for

# A new N-substituted heteroacene can detect CN<sup>-</sup> and F<sup>-</sup> anions via anion- $\pi$ interaction

Jianfeng Zhao,<sup>a,b</sup> Gang Li,<sup>a</sup> Chengyuan Wang,<sup>a</sup> Wangqiao Chen,<sup>a,c</sup> Say Chye Joachim Loo<sup>\*a,b</sup>  
and Qichun Zhang<sup>\*a,b,c</sup>

<sup>a</sup>School of Materials Science and Engineering, Nanyang Technological University, Singapore 639798, Singapore, Fax: (+65)67909081; Tel: (+65)67909081; E-mail: [qc Zhang@ntu.edu.sg](mailto:qc Zhang@ntu.edu.sg)

<sup>b</sup>Singapore Centre on Environmental Life Sciences Engineering (SCELSE), Nanyang Technological University, Singapore 637551, Singapore, Fax: 6790-9081, E-mail: [joachimloo@ntu.edu.sg](mailto:joachimloo@ntu.edu.sg)

<sup>c</sup>Institute for Sports Research, Nanyang Technological University, 50 Nanyang Avenue, Singapore 639798

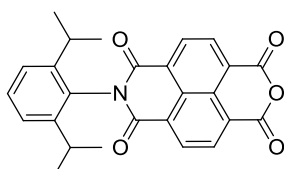

Chemical Formula: C<sub>26</sub>H<sub>21</sub>NO<sub>5</sub>  
Exact Mass: 427.14

2

Shimadzu Biotech Axima ToF<sup>2</sup> 2.9.3.20110624; Mode Reflectron\_HiRes\_neg, Power: 110  
%Int. 333 mV[sum= 15969 mV] Profiles 1-48: (48 Tagged) Smooth Av 20 -Baseline 20

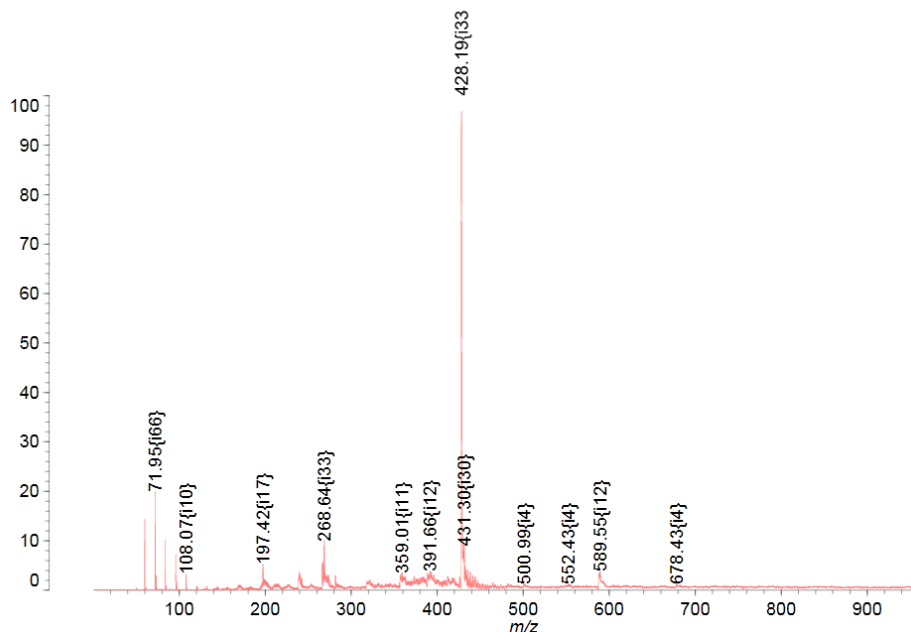

Figure S1 MALDI TOF of 2 without further purification

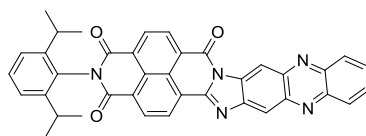

Chemical Formula: C<sub>38</sub>H<sub>27</sub>N<sub>5</sub>O<sub>3</sub>  
Exact Mass: 601.21

1

### Elemental Composition Report

Page 1

#### Single Mass Analysis

Tolerance = 10.0 PPM / DBE: min = -1.5, max = 100.0  
Element prediction: Off  
Number of isotope peaks used for i-FIT = 3

Monoisotopic Mass, Even Electron Ions

2 formula(e) evaluated with 1 results within limits (up to 50 closest results for each mass)

Elements Used:

C: 38-40 H: 25-29 N: 0-5 O: 0-3

C<sub>38</sub>H<sub>27</sub>N<sub>5</sub>O<sub>3</sub>

LIULEI3 2 (0.064)

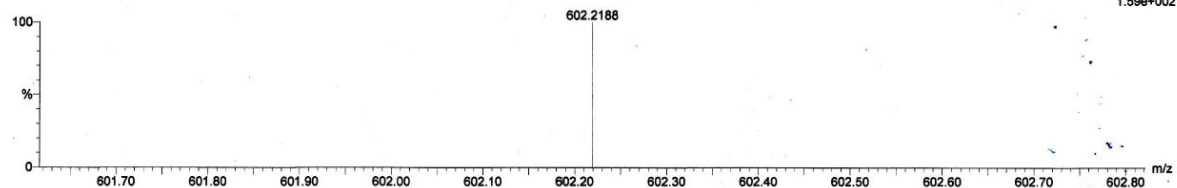

Minimum: -1.5  
Maximum: 5.0 10.0 100.0

| Mass     | Calc. Mass | mDa  | PPM  | DBE  | i-FIT | i-FIT (Norm) | Formula                                                       |
|----------|------------|------|------|------|-------|--------------|---------------------------------------------------------------|
| 602.2188 | 602.2192   | -0.4 | -0.7 | 27.5 | 20.6  | 0.0          | C <sub>38</sub> H <sub>28</sub> N <sub>5</sub> O <sub>3</sub> |

FigureS2 HiRes MALDI TOF of 1

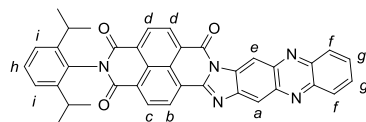

Chemical Formula: C<sub>38</sub>H<sub>27</sub>N<sub>5</sub>O<sub>3</sub>  
Exact Mass: 601.21

1

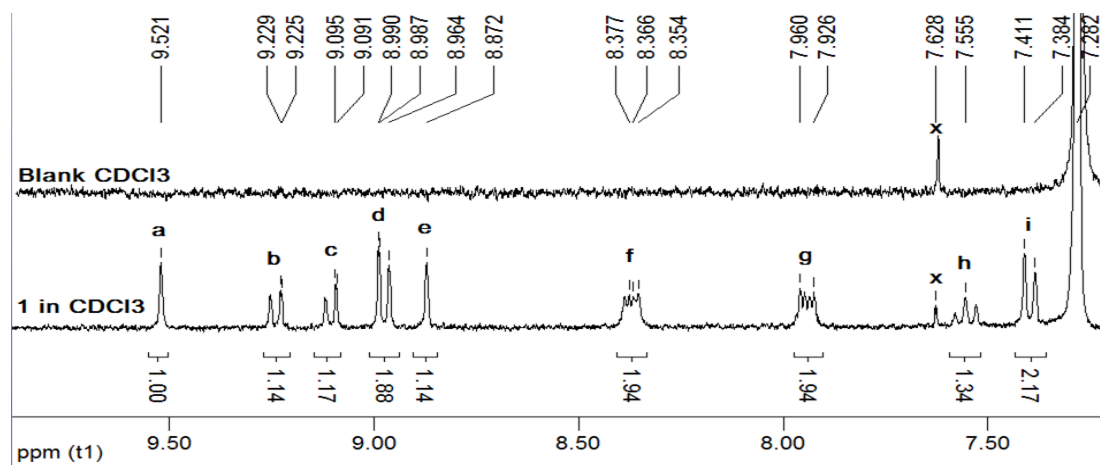

Figure S3. Blank CDCl<sub>3</sub> and aromatic proton peaks distribution of 1 in CDCl<sub>3</sub> via <sup>1</sup>H NMR (400 MHz) as labeled in molecular structure of 1.

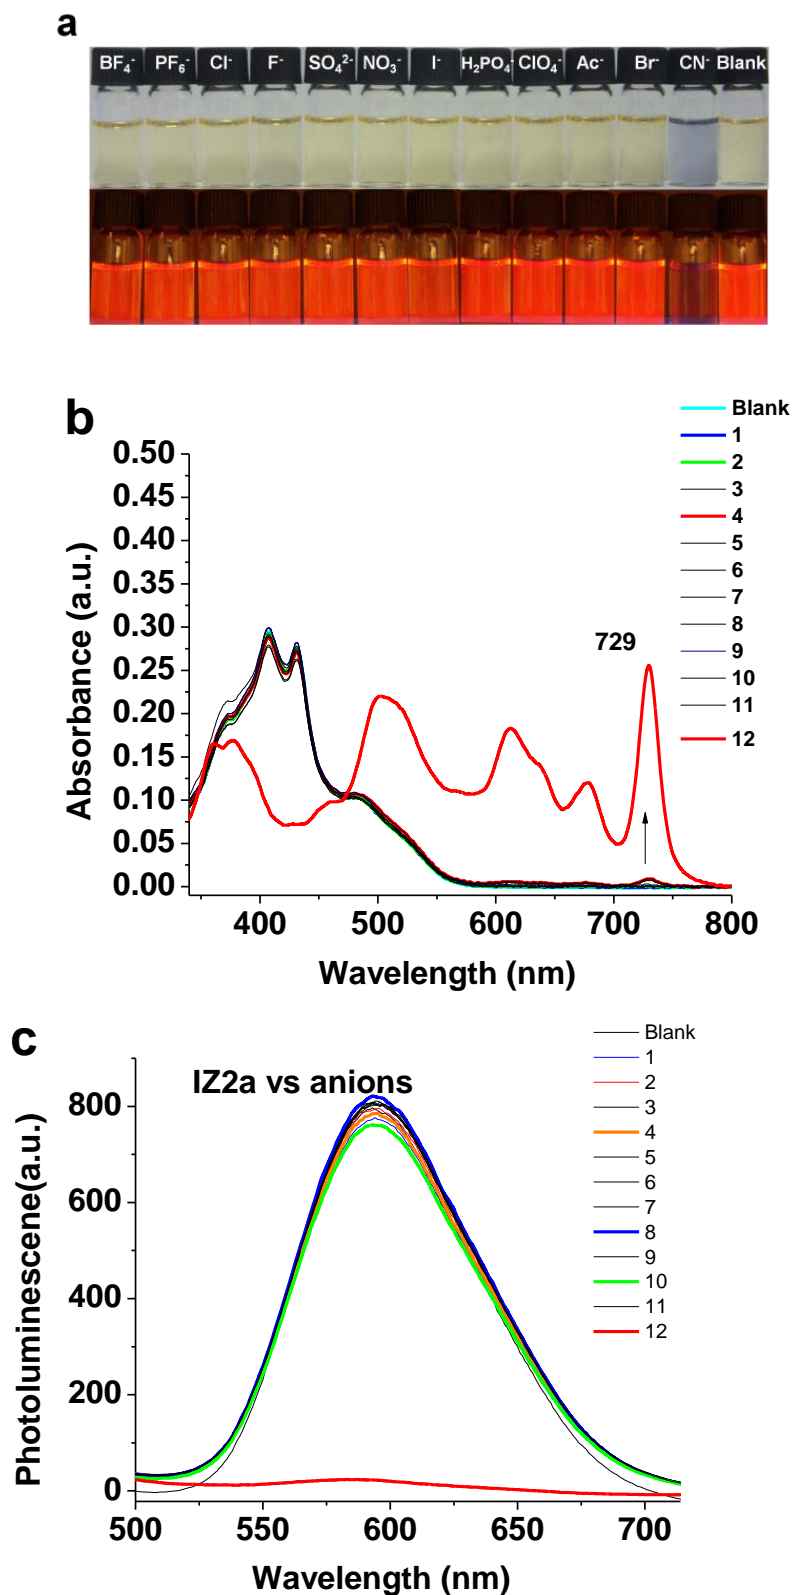

**Figure S4.** The picture of color change (a), UV-vis (b) and PL (c) spectra of **1** (1 eq., 2 mL,  $1.0 \times 10^{-5}$  M) in THF solution upon addition of anions 1-12 ( $\text{BF}_4^-$ ,  $\text{PF}_6^-$ ,  $\text{Cl}^-$ ,  $\text{F}^-$ ,  $\text{SO}_4^{2-}$ ,  $\text{NO}_3^-$ ,  $\text{I}^-$ ,  $\text{H}_2\text{PO}_4^-$ ,  $\text{ClO}_4^-$ ,  $\text{Ac}^-$ ,  $\text{Br}^-$ , and  $\text{CN}^-$ ) as TBA salts DMF solution (15 eq., 30  $\mu\text{L}$ ,  $1.0 \times 10^{-2}$  M).

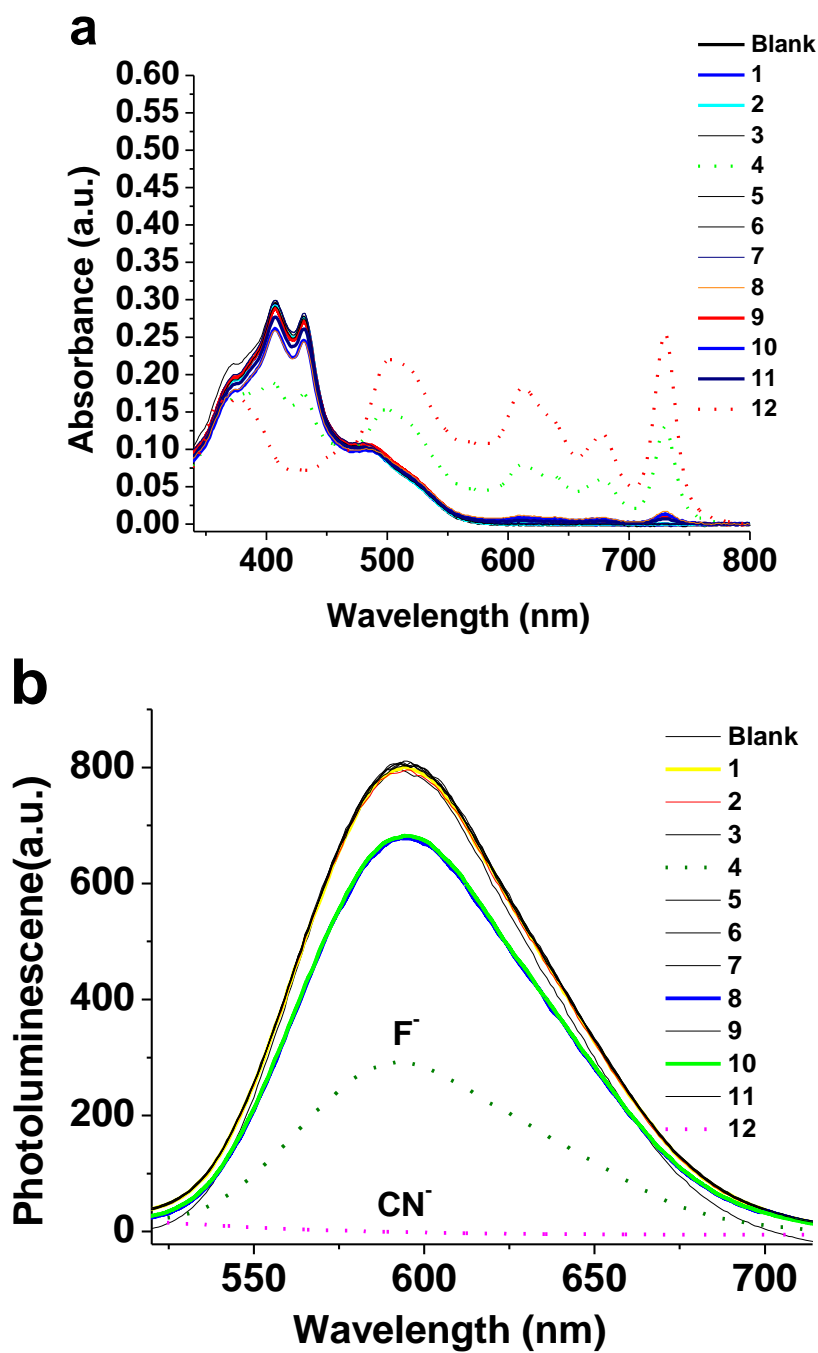

**Figure S5.** UV-vis (a) and PL (b) spectra of **1** (1 eq., 2 mL,  $1.0 \times 10^{-5}$  mol/L) in THF solution without changes upon the addition of 9 anions 1, 2, 5, 6, 7, 8, 9, 10, and 11 (see Figure S4) as TBA salts in DMF solution (30 eq., 60  $\mu$ L,  $1.0 \times 10^{-2}$  mol/L), respectively.

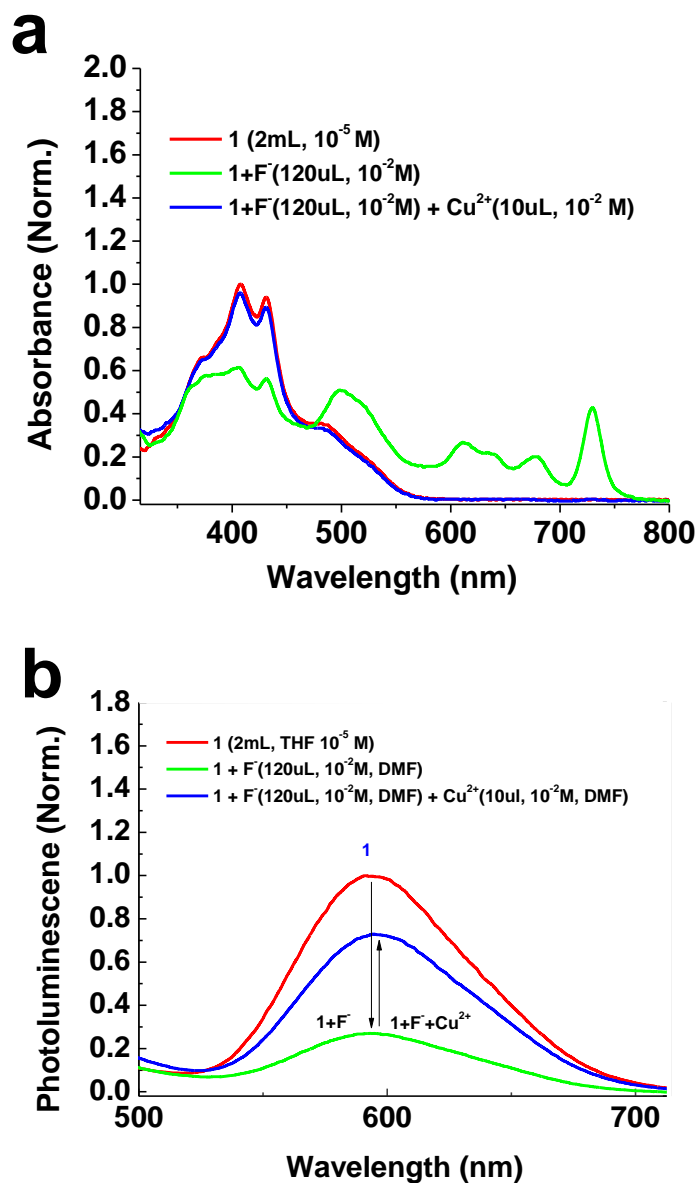

**Figure S6.** Normalized UV-Vis (a) and PL (b) spectra of **1** ( $1 \times 10^{-5}$  M) in THF solution upon addition of **60 eq.** of F<sup>-</sup> (120  $\mu$ L in DMF) and followed by the addition of 5 eq. Cu<sup>2+</sup> (10  $\mu$ L in DMF).

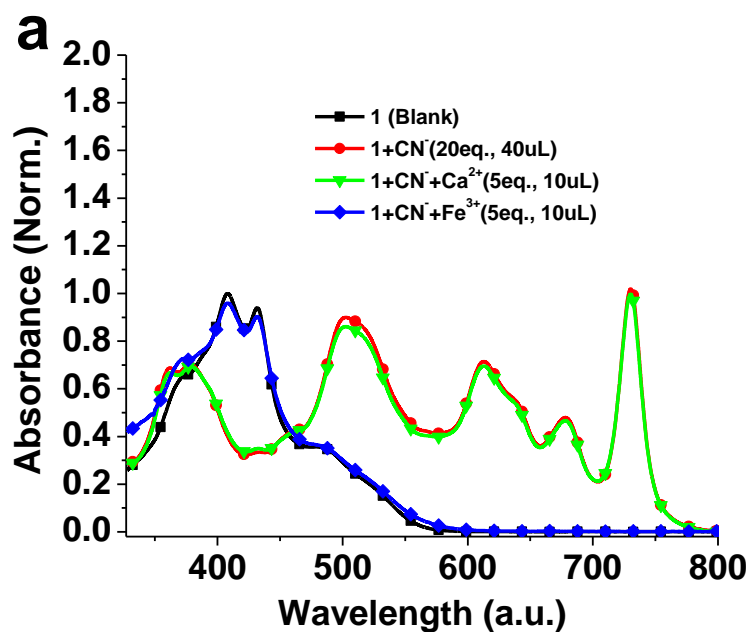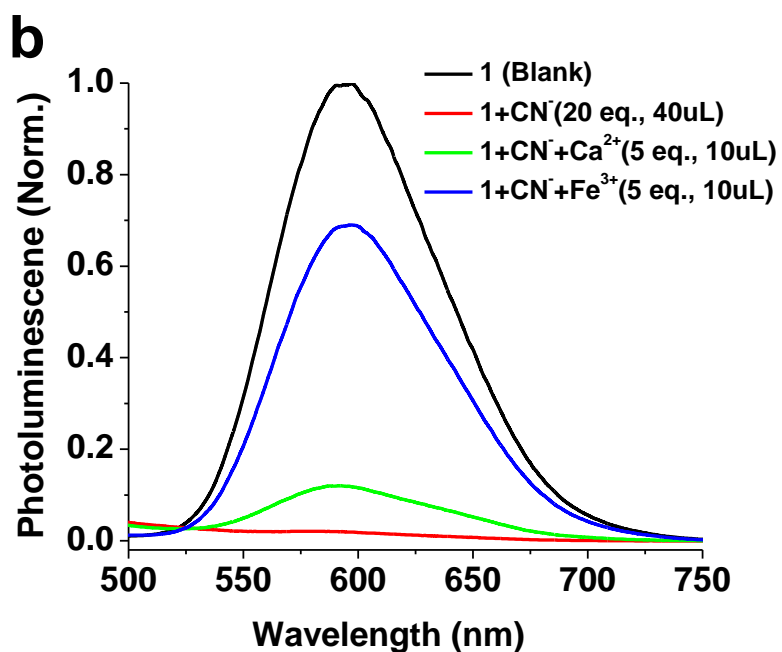

**Figure S7.** Normalized UV-Vis (a) and PL (b) spectra of **1** (1 eq., 2 mL,  $1 \times 10^{-5}$  M) in THF solution upon addition of 20 eq. of CN<sup>-</sup> (40 μL in DMF) and followed by the addition of 5 eq. Ca<sup>2+</sup> and Fe<sup>3+</sup> (10 μL in DMF) compared to Cu<sup>2+</sup> (10 μL in DMF).
